# Supplementary material for: Soil respiration database at different time scales in forest ecosystems across China
Source: Copernicus journal article supplement (doi:10.5194/essd-2021-454), 2022-03-04
Supplement: Supplementary file 1 [file essd-2021-454-supplement.pdf]

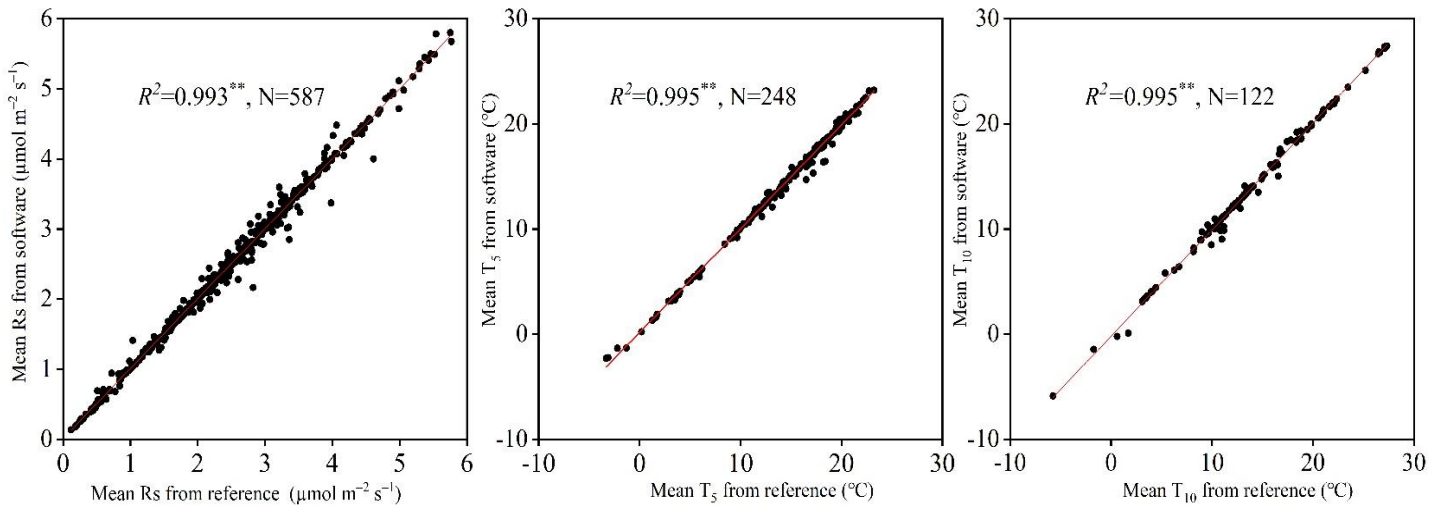

2 **Figure S1.** Validation of mean soil respiration rate ( $R_s$ ), soil temperature at 5 cm depth  
 3 ( $T_5$ ) and 10 cm depth ( $T_{10}$ ). The X axis stands for the means directly collected from the  
 4 original studies, and the Y axis stands for the averaged values from the extracted data  
 5 with a graphic digitizing software (WEBPLOTDIGITIZER) during the corresponding  
 6 observation period.

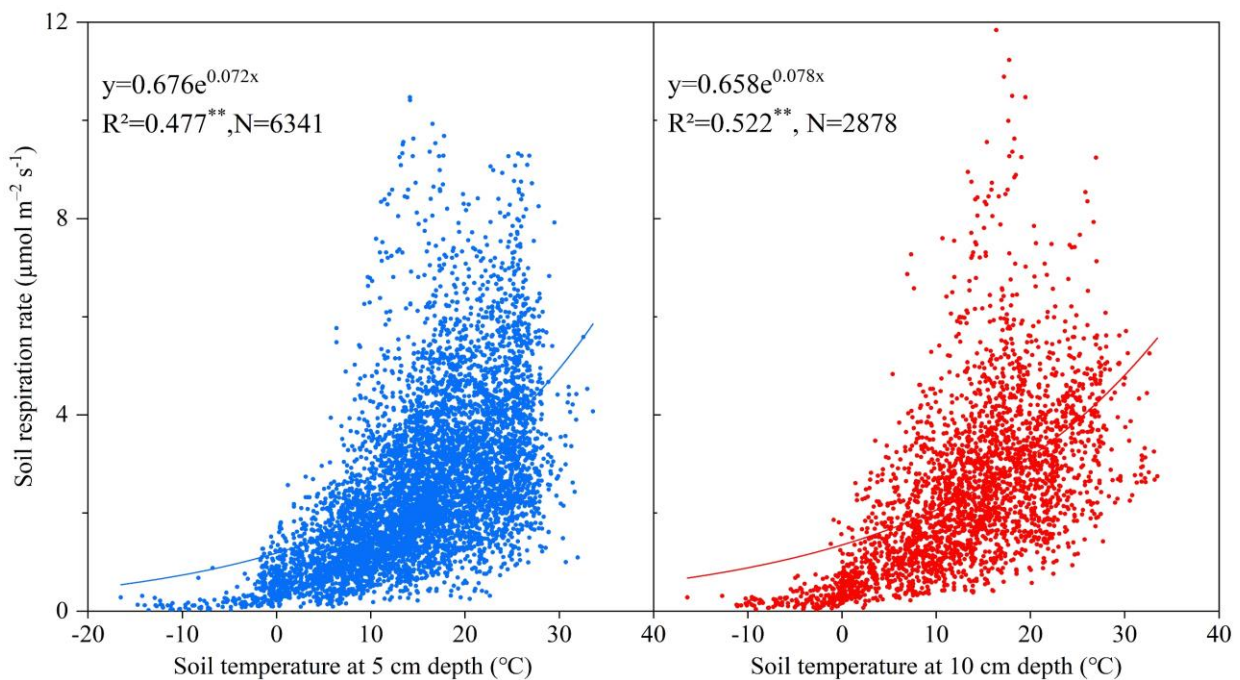

7 **Figure S2.** Exponential relationships of soil respiration rates with soil temperature at 5  
 8 cm depth and 10 cm depth in forest ecosystems across China.
