# Supplementary material for: Soil respiration database at different time scales in forest ecosystems across China
Source: Copernicus journal article supplement (doi:10.5194/essd-2021-454), 2022-03-04

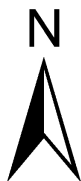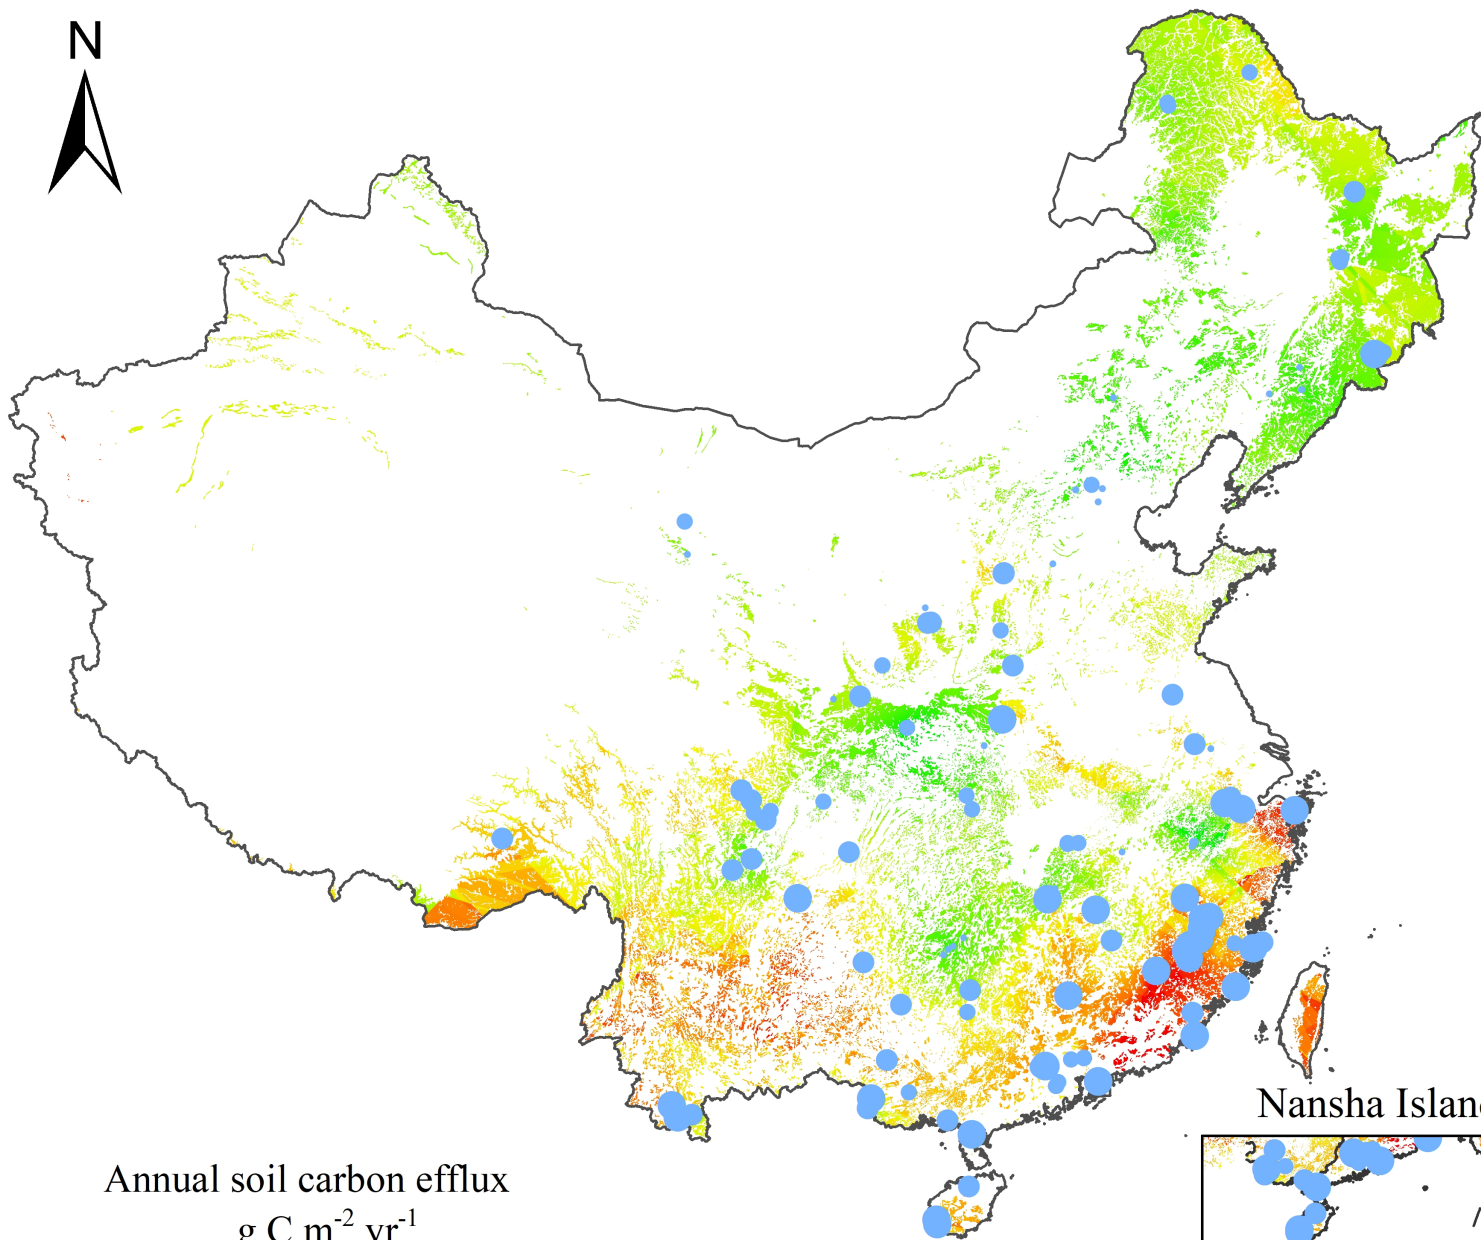

Annual soil carbon efflux  
 $\text{g C m}^{-2} \text{ yr}^{-1}$

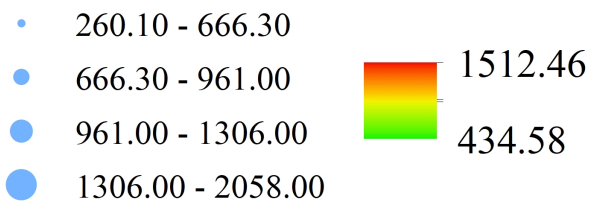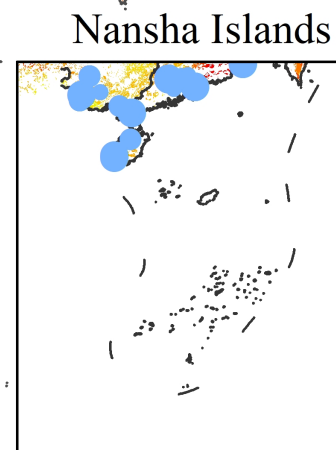

Supplement: Supplementary file [file essd-2021-454-AC1-supplement.pdf]
